# Supplementary material
Source: PubMed Central journal article supplement (PMC10099530)
Supplement: NIHMS1876708-supplement-Supplemental_Tables_1-4.pdf [file NIHMS1876708-supplement-Supplemental_Tables_1-4.pdf]

## Supplementary Material

### Article title: Genetic diagnosis impacts medical management in pediatric epilepsies

**Table S1.** Diagnostic yield by additional phenotypic features and types of epilepsy panels. Frequency of additional phenotypic features and panel type in relationship to diagnostic result of epilepsy panel and exome testing (n=602, columns 3-4) and to diagnostic exome after a non-diagnostic epilepsy panel (n=183, columns 5-6).

| Phenotype                           | Phenotypic categories                       | Diagnostic panel +/- exome<br>n (row %) | P value,<br>Chi-square<br>or Fisher's<br>exact | Diagnostic exome after non-diagnostic panel<br>n (row %) | P value,<br>Chi-square<br>or Fisher's<br>exact |
|-------------------------------------|---------------------------------------------|-----------------------------------------|------------------------------------------------|----------------------------------------------------------|------------------------------------------------|
| Total cohort                        |                                             | n=602 <sup>s</sup> , diagnostic in 152  |                                                | n=183 <sup>ss</sup> , diagnostic in 54                   |                                                |
| Developmental delay (if ≥ 2 y)      | Yes                                         | 117 (29.7)                              | <0.0001                                        | 48 (34.3)                                                | <0.0001                                        |
|                                     | No                                          | 13 (8.8)                                |                                                | 0                                                        |                                                |
| (if < 2 y)                          | Yes                                         | 17 (42.5)                               | 0.4091                                         | 6 (60.0)                                                 | 0.4545                                         |
|                                     | No                                          | 4 (25.0)                                |                                                | 0                                                        |                                                |
| Developmental regression (if < 3 y) | Yes, with EE                                | 8 (40.0)                                | 0.6265                                         | 2 (33.3)                                                 | 0.6447                                         |
|                                     | Yes, independent of seizures/change in EEG  | 1 (33.3)                                |                                                | 1 (100.0)                                                |                                                |
|                                     | Yes, unknown or other setting               | 3 (75.0)                                |                                                | 0                                                        |                                                |
|                                     | No                                          | 29 (39.2)                               |                                                | 9 (50.0)                                                 |                                                |
| Movement disorder by category       | Choreoathetosis                             | 7 (36.8)                                | 0.2372                                         | 3 (37.5)                                                 | 0.6953                                         |
|                                     | Dystonia (paroxysmal)                       | 4 (26.7)                                | 1                                              | 2 (40.0)                                                 | 0.6327                                         |
|                                     | Tremors                                     | 6 (24.0)                                | 0.8833                                         | 2 (50.0)                                                 | 0.5826                                         |
|                                     | Dyskinesias                                 | 5 (50.0)                                | 0.0693                                         | 3 (75.0)                                                 | 0.0778                                         |
|                                     | Tics                                        | 1 (9.1)                                 | 0.3061                                         | 1 (25.0)                                                 | 1                                              |
|                                     | Non-epileptic myoclonus                     | 3 (30.0)                                | 0.7187                                         | 1 (33.3)                                                 | 1                                              |
|                                     | Ataxia                                      | 6 (35.3)                                | 0.3335                                         | 3 (42.9)                                                 | 0.4226                                         |
|                                     | Other                                       | 2 (50.0)                                | 0.2656                                         | 2 (50.0)                                                 | 0.5826                                         |
|                                     | None                                        | 122 (24.0)                              | 0.1054                                         | 40 (26.5)                                                | 0.0518                                         |
| Stereotypies                        | Yes                                         | 22 (33.3)                               | 0.0993                                         | 10 (34.5)                                                | 0.5361                                         |
|                                     | No                                          | 128 (24.0)                              |                                                | 44 (28.8)                                                |                                                |
| Brain malformation                  | Yes                                         | 17 (16.7)                               | 0.0270                                         | 5 (23.8)                                                 | 0.5466                                         |
|                                     | No                                          | 134 (27.1)                              |                                                | 48 (30.2)                                                |                                                |
| Brain malformation by category      | Polymicrogyria                              | 1 (11.1)                                |                                                | 1 (100.0)                                                |                                                |
|                                     | Heterotopias                                | 1 (14.3)                                |                                                | 0                                                        |                                                |
|                                     | Cortical dysplasia                          | 3 (10.3)                                |                                                | 1 (16.7)                                                 |                                                |
|                                     | Agenesis of corpus callosum                 | 2 (33.3)                                |                                                | 0                                                        |                                                |
|                                     | Posterior fossa/cerebellar malformation     | 1 (10.0)                                |                                                | 0                                                        |                                                |
|                                     | Complex malformation with multiple features | 1 (9.1)                                 |                                                | 1 (25.0)                                                 |                                                |
|                                     | Other                                       | 8 (27.6)                                |                                                | 2 (40.0)                                                 |                                                |
| EEG encephalopathy pattern          | Burst suppression                           | 9 (52.9)                                | 0.0187                                         | 3 (75)                                                   | 0.0778                                         |
|                                     | Hypsarrhythmia (full or modified)           | 16 (21.9)                               | 0.4846                                         | 8 (25)                                                   | 0.5382                                         |
|                                     |                                             | 61 (30.1)                               | 0.0532                                         | 27 (36)                                                  | 0.1086                                         |

|                                          |                                                                                          |            |         |           |         |
|------------------------------------------|------------------------------------------------------------------------------------------|------------|---------|-----------|---------|
|                                          | Generalized slowing with multifocal sharp waves and/or generalized epileptiform activity | 7 (30.4)   | 0.5594  | 4 (44.4)  | 0.4530  |
|                                          | Slow spike and wave +/- fast activity                                                    | 2 (10.53)  | 0.1812  | 1 (16.7)  | 0.6719  |
|                                          | Electrical status epilepticus in sleep                                                   | 29 (30.2)  | 0.2225  | 10 (34.5) | 0.5220  |
|                                          | Other <sup>&amp;</sup>                                                                   | 47 (20.7)  | 0.0458  | 11 (20)   | 0.0645  |
|                                          | None                                                                                     |            |         |           |         |
| Epilepsy age of onset $\leq$ 1 y         | Yes                                                                                      | 111 (35)   | <0.0001 | 38 (37.6) | 0.0076  |
|                                          | No                                                                                       | 41 (14.5)  |         | 16 (19.5) |         |
| Epileptic spasms                         | Yes                                                                                      | 40 (25.5)  | 0.9389  | 19 (32.8) | 0.5114  |
|                                          | No                                                                                       | 112 (25.2) |         | 35 (28.0) |         |
| Refractory epilepsy                      | Yes                                                                                      | 112 (26.2) | 0.3775  | 43 (31.4) | 0.4686  |
|                                          | No                                                                                       | 37 (22.7)  |         | 11 (25.6) |         |
| Status epilepticus                       | Yes                                                                                      | 39 (26.9)  | 0.6097  | 13 (28.3) | 0.8303  |
|                                          | No                                                                                       | 112 (24.8) |         | 41 (29.9) |         |
| Seizure frequency at time of panel       | Daily                                                                                    | 79 (27.3)  | 0.7123  | N/A       | N/A     |
|                                          | Weekly                                                                                   | 17 (20.0)  |         |           |         |
|                                          | Monthly                                                                                  | 14 (26.9)  |         |           |         |
|                                          | Yearly                                                                                   | 34 (23.9)  |         |           |         |
|                                          | Seizure free >12 months                                                                  | 8 (24.2)   |         |           |         |
| Seizure frequency at time of exome       | Daily                                                                                    | 17 (41.5)  | 0.9466  | 14 (42.4) | 0.9559  |
|                                          | Weekly                                                                                   | 8 (38.1)   |         | 8 (44.4)  |         |
|                                          | Monthly                                                                                  | 3 (27.3)   |         | 3 (30.0)  |         |
|                                          | Yearly                                                                                   | 11 (35.5)  |         | 11 (36.7) |         |
|                                          | Seizure free >12 months                                                                  | 6 (37.5)   |         | 6 (40.0)  |         |
| Systemic malformations                   | Yes                                                                                      | 13 (33.3)  | 0.2295  | 8 (47.1)  | 0.0957  |
|                                          | No                                                                                       | 139 (24.7) |         | 46 (27.7) |         |
| Systemic malformation by category        | Cardiac                                                                                  | 6 (33.3)   |         | 4 (50.0)  |         |
|                                          | Renal                                                                                    | 2 (33.3)   |         | 1 (33.3)  |         |
|                                          | Extremities                                                                              | 1 (20.0)   |         | 0         |         |
|                                          | Other                                                                                    | 5 (33.3)   |         | 4 (57.1)  |         |
| Neurocutaneous findings                  | Capillary malformations                                                                  | 1 (25.0)   | 0.5197  | 1 (100.0) | 0.0694  |
|                                          | Hypopigmented macules                                                                    | 6 (37.5)   |         | 1 (2.05)  |         |
|                                          | Hyperpigmented areas                                                                     | 11 (24.4)  |         | 6 (60.0)  |         |
|                                          | Other                                                                                    | 1 (8.33)   |         | 0         |         |
|                                          | None                                                                                     | 133 (25.4) |         | 46 (27.9) |         |
| Muscle tone by category                  | Diffuse hypotonia                                                                        | 55 (32.7)  | <0.0001 | 23 (39.0) | <0.0001 |
|                                          | Axial hypotonia/ appendicular spasticity                                                 | 34 (40.5)  |         | 19 (52.9) |         |
|                                          | Axial hypotonia only                                                                     | 4 (36.4)   |         | 1 (25.0)  |         |
|                                          | Asymmetric increased tone                                                                | 2 (16.7)   |         | 1 (25.0)  |         |
|                                          | Dystonia, persistent                                                                     | 2 (40.0)   |         | 2 (50.0)  |         |
|                                          | Mixed                                                                                    | 2 (40.0)   |         | 0         |         |
|                                          | Normal                                                                                   | 53 (16.7)  |         | 8 (10.5)  |         |
| Other diagnoses contributing to epilepsy | Yes                                                                                      | 3 (5.36)   | <0.0001 | 0         | 0.1073  |
|                                          | No                                                                                       | 149 (27.5) |         | 54 (30.9) |         |
| If other, genetic?                       | Yes                                                                                      | 2 (7.7)    | 0.5920  | 0         | N/A     |
|                                          | No                                                                                       | 1 (3.3)    |         | 0         |         |

|                                    |                                                                                                                                  |                                                                                                             |         |                        |         |
|------------------------------------|----------------------------------------------------------------------------------------------------------------------------------|-------------------------------------------------------------------------------------------------------------|---------|------------------------|---------|
| Result impacted medical management | Yes<br>No                                                                                                                        | 110 (83.3)<br>35 (10.8)                                                                                     | <0.0001 | 30 (76.9)<br>21 (21.0) | <0.0001 |
| Gene-specific family organization  | Yes<br>No                                                                                                                        | 111 (87.4)<br>41 (66.1)                                                                                     | 0.0005  | 33 (91.7)<br>21 (65.6) | 0.0144  |
| Types of epilepsy panels (EP)*     | Comprehensive EP<br>Infantile EP<br>Childhood onset EP<br>STAT EP<br>EpiXpanded Panel<br>Epilepsy Del/Dup Panel<br>Adolescent EP | 411 (68.3)<br>129 (21.4)<br>36 (5.9)<br>14 (2.3)<br>6 (1.0)<br>5 (0.8)<br>1 (0.2)                           | <0.0001 | N/A                    | N/A     |
| Panel yield by year of testing     | 2012<br>2013<br>2014<br>2015<br>2016<br>2017<br>2018                                                                             | 2/16 (12.5)<br>6/76 (7.9)<br>28/128 (21.9)<br>22/191 (11.5)<br>15/58 (25.9)<br>11/35 (31.4)<br>12/98 (12.2) | 0.0035  | N/A                    | N/A     |

<sup>§</sup>Numbers for cohorts with age cutoffs:  $\geq 2$  years = 544

<sup>§§</sup>Numbers for cohorts with age cutoffs:  $\geq 2$  years = 171

<sup>&</sup>Other encephalopathy patterns included discontinuity, frequent/abundant epileptiform activity contributing to encephalopathy (focal or generalized), and generalized slowing with poor organization.

\*Includes diagnostic and non-diagnostic panels. Percentages are out of the total cohort (602).

**Table S2.** Univariate logistic regression analysis for phenotypic predictors of A) diagnostic epilepsy gene panel or exome sequencing and B) diagnostic compared to non-diagnostic exome sequencing after a non-diagnostic epilepsy gene panel. Variables with p-value of <0.25 were included in the initial multivariate regression model prior to backwards selection. Developmental delay was present in all individuals with a diagnostic exome after negative panel and thus could not be used as a predictor; GDD was used instead.

| Phenotypic predictor variable                                                                                          | Odds ratio (95% confidence interval) for relationship with diagnostic panel or exome | P value, Wald test |
|------------------------------------------------------------------------------------------------------------------------|--------------------------------------------------------------------------------------|--------------------|
| <b>A. Univariate logistic regression model for predictors of diagnostic epilepsy gene panel or exome, combined</b>     |                                                                                      |                    |
| Age of epilepsy onset $\leq 2$                                                                                         | 4.23 (2.60, 6.90)                                                                    | <0.0001            |
| Abnormal muscle tone                                                                                                   | 2.65 (1.81, 3.89)                                                                    | <0.0001            |
| Strong family history, other than 1 <sup>st</sup> degree relatives                                                     | 0.89 (0.57, 1.38)                                                                    | 0.59               |
| First degree family history of epilepsy                                                                                | 1.26 (0.72, 2.20)                                                                    | 0.42               |
| Consanguinity                                                                                                          | 1.24 (0.64, 2.40)                                                                    | 0.52               |
| Head size                                                                                                              |                                                                                      |                    |
| Microcephaly compared to normal                                                                                        | 1.31 (0.79, 2.18)                                                                    | 0.29               |
| Macrocephaly compared to normal                                                                                        | 0.71 (0.29, 1.78)                                                                    | 0.47               |
| Epilepsy type                                                                                                          |                                                                                      |                    |
| Generalized or mixed compared to focal                                                                                 | 0.86 (0.58, 1.28)                                                                    | 0.45               |
| Refractory epilepsy                                                                                                    | 1.21 (0.79, 1.85)                                                                    | 0.38               |
| EEG encephalopathy pattern (Y/N)                                                                                       | 1.49 (1.01, 2.21)                                                                    | 0.05               |
| Malformation of brain development (Y/N)                                                                                | 0.54 (0.31, 0.94)                                                                    | 0.03               |
| Systemic malformations                                                                                                 | 1.52 (0.76, 3.05)                                                                    | 0.23               |
| Autism spectrum disorder                                                                                               | 0.92 (0.57, 1.49)                                                                    | 0.73               |
| Developmental regression                                                                                               | 1.15 (0.77, 1.73)                                                                    | 0.49               |
| Cerebral visual impairment                                                                                             | 1.95 (1.25, 3.05)                                                                    | 0.003              |
| Dysmorphic features                                                                                                    | 1.51 (0.92, 2.50)                                                                    | 0.11               |
| Sex, Male                                                                                                              | 0.97 (0.67, 1.40)                                                                    | 0.88               |
| Seizure types                                                                                                          |                                                                                      |                    |
| Generalized motor                                                                                                      | 0.94 (0.65, 1.36)                                                                    | 0.74               |
| Generalized non-motor                                                                                                  | 0.63 (0.39, 1.01)                                                                    | 0.06               |
| Focal motor                                                                                                            | 2.43 (1.65, 3.59)                                                                    | <0.0001            |
| Focal non-motor                                                                                                        | 1.33 (0.91, 1.96)                                                                    | 0.14               |
| Developmental delay, global or in one area                                                                             | 3.86 (2.25, 6.64)                                                                    | <0.0001            |
| <b>B. Univariate logistic regression model for predictors of diagnostic exome after a negative epilepsy gene panel</b> |                                                                                      |                    |

|                                                                    |                     |         |
|--------------------------------------------------------------------|---------------------|---------|
| Age of epilepsy onset $\leq 2$                                     | 5.06 (2.02, 12.70)  | 0.0005  |
| Abnormal muscle tone                                               | 6.41 (2.81, 14.65)  | <0.0001 |
| Strong family history, other than 1 <sup>st</sup> degree relatives | 0.54 (0.24, 1.22)   | 0.14    |
| First degree family history of epilepsy                            | 1.28 (0.51, 3.21)   | 0.61    |
| Consanguinity                                                      | 0.58 (0.21, 1.57)   | 0.28    |
| Head size                                                          |                     |         |
| Microcephaly compared to normal                                    | 2.65 (1.20, 5.85)   | 0.02    |
| Macrocephaly compared to normal                                    | 1.71 (0.47, 6.21)   | 0.41    |
| Epilepsy type                                                      |                     |         |
| Generalized or mixed compared to focal                             | 1.24 (0.60, 2.58)   | 0.56    |
| Refractory epilepsy                                                | 1.33 (0.61, 2.89)   | 0.47    |
| EEG encephalopathy pattern (Y/N)                                   | 1.98 (0.93, 4.22)   | 0.08    |
| Malformation of brain development (Y/N)                            | 0.72 (0.25, 2.09)   | 0.55    |
| Systemic malformations                                             | 2.32 (0.84, 6.38)   | 0.10    |
| Autism spectrum disorder                                           | 1.11 (0.55, 2.27)   | 0.77    |
| Developmental regression                                           | 1.07 (0.56, 2.06)   | 0.84    |
| Cerebral visual impairment                                         | 1.98 (0.96, 4.10)   | 0.06    |
| Dysmorphic features                                                | 4.48 (1.91, 10.48)  | 0.0005  |
| Sex, Male                                                          | 0.99 (0.52, 1.86)   | 0.96    |
| Seizure types                                                      |                     |         |
| Generalized motor                                                  | 1.30 (0.68, 2.50)   | 0.43    |
| Generalized non-motor                                              | 0.47 (0.19, 1.15)   | 0.10    |
| Focal motor                                                        | 1.41 (0.74, 2.69)   | 0.29    |
| Focal non-motor                                                    | 1.46 (0.76, 2.82)   | 0.25    |
| Global developmental delay                                         | 11.48 (3.40, 38.74) | <0.0001 |

**Table S3.** Genetic information for variants identified on panel or exome that clinically explain epilepsy for 152 individuals.

| Study ID | Gene           | Zygosity | cDNA                       | Variant                                                  | Transcript ID              | Medical management impact category* |
|----------|----------------|----------|----------------------------|----------------------------------------------------------|----------------------------|-------------------------------------|
| B0459    | <i>ACTB</i>    | Het      | c.1002G>C                  | p.Glu334Asp                                              | NM_001101.3                | C                                   |
| B0411    | <i>AGO1</i>    | Het      | c.595G>A                   | p.Gly199S                                                | NM_012199.3                | NR                                  |
| B0249    | <i>ALG11</i>   | Hom      | c.1402C>T                  | p.Arg468Cys                                              | NM_001004127.2             | C                                   |
| B0257    | <i>ALG11</i>   | Hom      | c.1402C>T                  | p.Arg468Cys                                              | NM_001004127.2             | C                                   |
| B0500    | <i>AP4S1</i>   | Hom      | c.295-3C>A                 | IVS4-3 C>A                                               | NM_007077.4                | C                                   |
| B0213    | <i>ARHGEF9</i> | Het      | c.1285delG                 | p.Glu429Lysfs*19                                         | NM_015185.2                | NR                                  |
| B0091    | <i>ARX</i>     | Hemi     | c.1141G>A                  | p.Ala381Thr                                              | NM_139058.2                | NR                                  |
| B0533    | <i>ARX</i>     | Hemi     | c.1612A>G                  | p.Lys538Glu                                              | NM_139058.2                | NR                                  |
| B0252    | <i>ATPIA3</i>  | Het      | c.2219T>C                  | p.Lys740Pro                                              | NM_152296.4                | T                                   |
| B0205    | <i>ATP6VIA</i> | Het      | c.1123C>A                  | p.Pro375Thr                                              | NM_001690.3                | C                                   |
| B0241    | <i>BRAT1</i>   | CH       | c.419T>C<br>c.171delG      | p.Leu140Pro<br>p.Glu57Aspfs*7                            | NM_152743.4                | C, P                                |
| B0506    | <i>CACNA1A</i> | Het      | c.4177G>C                  | p.Val1393Leu                                             | NM_001127221.1             | D                                   |
| B0275    | <i>CACNA1E</i> | Het      | c.5159C>G                  | p.Ala1720Gly                                             | NM_000721.3                | NR                                  |
| C0003    | <i>CDKL5</i>   | Het      | c.1671dupA                 | p.Arg558Thrfs*9                                          | NM_003159.2                | T, C, P                             |
| C0005    | <i>CDKL5</i>   | Het      | c.533G>A                   | p.Arg178Gln                                              | NM_003159.2                | T, C, P                             |
| C0017    | <i>CDKL5</i>   | Hemi     | c.2152G>A                  | p.Val718Met                                              | NM_003159.2                | T, C, P                             |
| C0023    | <i>CDKL5</i>   | Het      | c.1909delG                 | p.Ala6371Leufs*21                                        | NM_003159.2                | T, C, P                             |
| C0033    | <i>CDKL5</i>   | Het      | c.766C>T                   | p.Gln256*                                                | NM_003159.2                | T, C, P                             |
| C0047    | <i>CDKL5</i>   | Het      | c.383delA                  | p.Lys128Argfs*9                                          | NM_003159.2                | T, C, P                             |
| B0341    | <i>CHAT</i>    | CH       | c.620G>A<br>c.635T>A       | p.Arg207His<br>p.Val212Asp                               | NM_020549.4<br>NM_020549.4 | C, P                                |
| B0053    | <i>CHD2</i>    | Het      | c.2876+3_2876+6delA<br>AGT | IVS22+3_IVS22+6del4                                      | NM_001271.3                | NR                                  |
| B0131    | <i>CHD2</i>    | Het      | c.3456-2A>G                | IVS27-2A>G                                               | NM_001271.3                | NR                                  |
| B0457    | <i>CHD2</i>    | Het      | c.4706_4709delAAGA         | p.Lys1569Thrfs*3                                         | NM_001271.3                | NR                                  |
| B0614    | <i>CHD2</i>    | Het      | c.4173dupA                 | p.Gln1392Thrfs*17                                        | NM_001271.3                | C                                   |
| B0631    | <i>CHD2</i>    | Het      | c.4893_4905del13           | p.His1631Glnfs*179                                       | NM_001271.3                | C                                   |
| B0279    | <i>CHRNA7</i>  | Het      | n/a                        | 15q13.3del, incl, at least exons 1-4 of <i>CHRNA7</i>    | NM_000746.5                | NR                                  |
| B0420    | <i>CNTNAP2</i> | CH       | n/a<br>c.1739G>A           | Partial gene deletion including exons 4-6<br>p.Cys580Tyr | NM_014141.5<br>NM_014141.5 | C                                   |
| B0295    | <i>COL4A1</i>  | Het      | c.943C>T                   | p.Arg315Cys                                              | NM_001845.4                | C                                   |
| B0659    | <i>DLL1</i>    | Het      | c.2048+2T>C                | IVS9+2 T>C                                               | NM_005618.3                | NR                                  |
| B0102    | <i>DYNC1H1</i> | Het      | c.1103G>C                  | p.Arg368Pro                                              | NM_001376.4                | C                                   |

|       |                |     |                             |                                           |                |         |
|-------|----------------|-----|-----------------------------|-------------------------------------------|----------------|---------|
| B0499 | <i>DYNC1H1</i> | Het | c.3606C>G                   | p.Phe1202Leu                              | NM_001376.4    | C       |
| B0686 | <i>DYNC1H1</i> | Het | c.5864G>T                   | p.Gly1955Val                              | NM_001376.4    | C       |
| B0639 | <i>EEF1A2</i>  | Het | c.1375_1383delCAGA<br>AGGCG | p.Gln459_Ala461del                        | NM_001958.3    | NR      |
| B0049 | <i>ERCC5</i>   | Hom | c.205C>T                    | p.Arg69*                                  | NM_000123      | NR      |
| B0310 | <i>FOXG1</i>   | Het | c.460G>T                    | p.Glu154*                                 | NM_001165963.1 | U       |
| B0200 | <i>FRRS1L</i>  | Hom | c.737_739delGAG             | p.Gly246del                               | NM_014334.2    | T       |
| B0437 | <i>FRRS1L</i>  | Hom | c.737_739delGAG             | p.Gly246del                               | NM_014334.2    | NR      |
| B0111 | <i>GABRB2</i>  | Het | c.755C>T                    | p.Pro252Leu                               | NM_021911.2    | NR      |
| B0272 | <i>GABRG2</i>  | Het | c.1000G>A                   | p.Ala334Thr                               | NM_000816.3    | NR      |
| B0294 | <i>GNAO1</i>   | Het | c.119G>A                    | p.Gly40Glu                                | NM_020988.2    | C, D    |
| B0044 | <i>GRIN2A</i>  | Het | c.1930A>G                   | p.Ser644Gly                               | NM_000833.3    | T       |
| B0426 | <i>GRIN2A</i>  | Het | c.2140delG                  | p.Glu714Argfs*7                           | NM_000833.3    | T       |
| B0460 | <i>GRIN2A</i>  | Het | c.165C>A                    | p.Trp55*                                  | NM_000833.3    | NR      |
| B0206 | <i>HNRNPU</i>  | Het | c.1681C>T                   | p.Gln561*                                 | NM_031844.2    | NR      |
| B0464 | <i>HNRNPU</i>  | Het | c.2014delG                  | p.Glu672Lysfs*162                         | NM_031844.2    | NR      |
| B0169 | <i>IFIH1</i>   | Het | c.2336G>A                   | p.Arg779His                               | NM_022168.4    | C       |
| B0178 | <i>IQSEC2</i>  | Het | c.2911C>T                   | p.Arg971*                                 | NM_001111125.1 | NR      |
| B0126 | <i>ITPA</i>    | Hom | c.452G>A                    | p.Trp151*                                 | NM_033453.3    | NR      |
| B0419 | <i>KANSL1</i>  | Het | c.1651dupA                  | p.Thr551Asnfs*13                          | NM_001193466.1 | C       |
| B0463 | <i>KANSL1</i>  | Het | n/a                         | 17q21.31del, incl.<br><i>KANSL1</i>       | NM_001193466.1 | C       |
| B0030 | <i>KCNHI1</i>  | Het | c.1474G>A                   | p.Ala492Thr                               | NM_172362.2    | C       |
| B0482 | <i>KCNMA1</i>  | Het | c.1918C>T                   | p.Arg640*                                 | NM_002247.3    | C       |
| B0038 | <i>KCNQ2</i>   | Het | c.1742G>A                   | p.Arg581Gln                               | NM_172107.2    | T       |
| B0041 | <i>KCNQ2</i>   | Het | c.1742G>A                   | p.Arg581Gln                               | NM_172707.2    | T, P    |
| B0085 | <i>KCNQ2</i>   | Het | n/a                         | partial deletion including<br>exons 11-13 | NM_172107.2    | P       |
| B0128 | <i>KCNQ2</i>   | Het | c.583T>C                    | p.Ser195Pro                               | NM_172107.2    | T, C    |
| B0150 | <i>KCNQ2</i>   | Het | c.638G>A                    | p.Arg213Gln                               | NM_172107.2    | T       |
| B0180 | <i>KCNQ2</i>   | Het | c.915C>A                    | p.Phe305Leu                               | NM_172107.2    | T, P    |
| B0350 | <i>KCNQ2</i>   | Het | c.286dupC                   | p.His96Profs*24                           | NM_172107.2    | P       |
| B0352 | <i>KCNQ2</i>   | Het | c.902G>T                    | p.Gly301Val                               | NM_172107.2    | T       |
| B0444 | <i>KCNQ2</i>   | Het | c.740C>T                    | p.Ser247Leu                               | NM_172107.2    | T       |
| B0564 | <i>KCNQ2</i>   | Het | c.927+1G>A                  | IVS6+1 G>A                                | NM_172107.2    | U       |
| B0634 | <i>KCNQ2</i>   | Het | c.1709delA                  | p.Gln570Argfs*50                          | NM_172107.2    | T, C, P |
| B0651 | <i>KCNQ2</i>   | Het | c.842G>A                    | p.Gly281Glu                               | NM_172107.2    | T, C, P |
| B0145 | <i>KCNT1</i>   | Het | c.2688G>C                   | p.Met896Ile                               | NM_020822.2    | T, C    |
| B0701 | <i>KCNT1</i>   | Het | c.1283G>A                   | p.Arg428Gln                               | NM_020822.2    | T       |
| B0031 | <i>MECP2</i>   | Het | c.275delG                   | p.Gly92Aspfs*33                           | NM_004992.3    | C, P    |
| B0243 | <i>MECP2</i>   | Het | c.502C>T                    | p.Arg168*                                 | NM_004992.3    | C       |

|       |                                |     |                               |                                          |                                    |         |
|-------|--------------------------------|-----|-------------------------------|------------------------------------------|------------------------------------|---------|
| B0697 | <i>MEF2C</i>                   | Het | c.44G>A                       | p.Arg15His                               | NM_002397.3                        | T       |
| B0159 | <i>NBEA</i>                    | Het | c.4702dupG                    | p.Val1568Glyfs*14                        | NM_015678.4                        | NR      |
| B0487 | <i>NEXMIF</i>                  | Het | c.937C>T                      | p.Arg313*                                | NM_001008537.1                     | NR      |
| B0537 | <i>NEXMIF</i>                  | Het | c.1493C>A                     | p.Ser498*                                | NM_001008537.1                     | U       |
| B0542 | <i>NHLRC1</i><br><i>NHLRC1</i> | CH  | c.656G>A<br>c.451G>T          | p.Trp219*<br>p.Val151Phe                 | NM_198586.2                        | T, C, P |
| B0055 | <i>NPRL2</i>                   | Het | c.57_59delGGGinsCG            | p.Gly20Aspfs*45                          | NM_006545.4                        | NR      |
| B0046 | <i>NRXN1</i><br><i>NRXN2</i>   | CH  | c.2686C>T<br>c.3176G>A        | p.Arg896Trp<br>p.Arg1059Gln              | NM_0011335639.1<br>NM_0011335639.1 | NR      |
| B0443 | <i>NRXN1</i>                   | Het | n/a                           | partial deletion including<br>exons 7-10 | NM_001135659.1                     | NR      |
| B0333 | <i>PACS2</i>                   | Het | c.625G>A                      | p.Glu209Lys                              | NM_001100913.2                     | U       |
| B0694 | <i>PACS2</i>                   | Het | c.631G>A                      | p.Glu211Lys                              | NM_001100913.2                     | P       |
| B0261 | <i>PCDH19</i>                  | Het | c.2113C>T                     | p.Arg705*                                | NM_001105243.1                     | C, P    |
| B0307 | <i>PCDH19</i>                  | Het | c.695A>G                      | p.Asn232Ser                              | NM_001105243.1                     | T, C    |
| B0217 | <i>PLPBP</i>                   | Hom | c.347C>T                      | p.Thr116Ile                              | NM_007198.3                        | T       |
| B0029 | <i>PNPO</i>                    | Hom | c.674G>T                      | p.Arg225Leu                              | NM_018129.3                        | T       |
| B0095 | <i>PNPO</i>                    | Hom | c.686G>A                      | p.Arg229Gln                              | NM_018129.3                        | T       |
| B0271 | <i>PNPO</i>                    | Hom | c.674G>T                      | p.Arg225Leu                              | NM_018129.3                        | T       |
| B0028 | <i>POLG</i>                    | CH  | c.2800_2801delAA<br>c.3286C>T | p.Lys934Aspfs*10<br>p.Arg1096Cys         | NM_002693.2<br>NM_002693.2         | T, C, P |
| B0625 | <i>POLG</i>                    | CH  | c.2243G>C<br>c.3356T>C        | p.Trp748Ser<br>p.Leu1119Pro              | NM_002693.2<br>NM_002693.2         | T, C, P |
| B0051 | <i>PRRT2</i>                   | Het | c.649dupC                     | p.Arg217Profs*8                          | NM_145239.2                        | C, P    |
| B0065 | <i>PRRT2</i>                   | Het | c.649dupC                     | p.Arg217Profs*8                          | NM_145239.2                        | T, C, P |
| B0067 | <i>PRRT2</i>                   | Het | n/a                           | whole gene deletion                      | NM_145239.2                        | T, C, P |
| B0328 | <i>PRRT2</i>                   | Het | c.649dupC                     | p.Arg217Profs*8                          | NM_145239.2                        | C, P    |
| B0434 | <i>PRRT2</i>                   | Het | c.629dupC                     | p.Ala211Serfs*14                         | NM_145239.2                        | T, C, P |
| B0441 | <i>PRRT2</i>                   | Het | c.649dupC                     | p.Arg217Profs*8                          | NM_145239.2                        | C, P    |
| B0558 | <i>PRRT2</i>                   | Het | c.649delC                     | p.Arg217Glnfs*12                         | NM_145239.2                        | T, C, P |
| B0658 | <i>PRRT2</i>                   | Het | c.649dupC                     | p.Arg217Profs*8                          | NM_145239.2                        | T, C    |
| B0278 | <i>RHOBTB2</i>                 | Het | c.1448G>A                     | p.Arg483His                              | NM_001160036.1                     | NR      |
| B0068 | <i>SCN1A</i>                   | Het | c.2589+3A>T                   | IVS14+3A>T                               | NM_001165963.1                     | T, P    |
| B0069 | <i>SCN1A</i>                   | Het | c.986G>T                      | p.Gly329Val                              | NM_001165963.1                     | T, C, P |
| B0072 | <i>SCN1A</i>                   | Het | c.662T>C                      | p.Leu221Pro                              | NM_001165963.1                     | T, C, P |
| B0079 | <i>SCN1A</i>                   | Het | n/a                           | partial deletion including<br>exon 21    | NM_006920.4                        | T       |
| B0086 | <i>SCN1A</i>                   | Het | c.4573C>T                     | p.Arg1525*                               | NM_001165963.1                     | T       |
| B0225 | <i>SCN1A</i>                   | Het | c.418A>G                      | p.Thr140Ala                              | NM_001165963.1                     | T       |
| B0226 | <i>SCN1A</i>                   | Het | c.2134C>T                     | p.Arg712*                                | NM_001165963.1                     | T       |
| B0175 | <i>SCN1A</i>                   | Het | c.4318delG                    | p.Ala1440Glnfs*36                        | NM_001165963.1                     | U       |



|       |                |     |                        |                          |                            |         |
|-------|----------------|-----|------------------------|--------------------------|----------------------------|---------|
| B0304 | <i>SCN1A</i>   | Het | c.1837C>T              | p.Arg613*                | NM_001165963.1             | T, P    |
| B0306 | <i>SCN1A</i>   | Het | c.4786C>T              | p.Arg1596Cys             | NM_001165963.1             | T, C, P |
| B0312 | <i>SCN1A</i>   | Het | c.5375C>A              | p.Ala1792Asp             | NM_001165963.1             | T, C, P |
| B0405 | <i>SCN1A</i>   | Het | c.5000T>C              | p.Leu1667Pro             | NM_001165963.1             | T       |
| B0408 | <i>SCN1A</i>   | Het | c.332T>A               | p.Leu111*                | NM_001165963.1             | T       |
| B0525 | <i>SCN1A</i>   | Het | c.2589+2T>C            | IVS14+2 T>C              | NM_001165963.1             | T       |
| B0584 | <i>SCN1A</i>   | Het | c.825T>A               | p.Asn275Lys              | NM_001165963.1             | T, C, P |
| B0552 | <i>SCN1A</i>   | Het | c.5299delG             | p.Val1767Serfs*12        | NM_001165963.1             | T, C    |
| B0644 | <i>SCN1A</i>   | Het | c.235G>A               | p.Asp79Asn               | NM_001165963.1             | T, C    |
| B0688 | <i>SCN1A</i>   | Het | c.2979_2992del14       | p.Ser993Argfs*7          | NM_001165963.1             | T, C, P |
| B0698 | <i>SCN1A</i>   | Het | c.2837G>A              | p.Arg946His              | NM_001165963.1             | T, C, P |
| B0451 | <i>SCN1B</i>   | Hom | c.449-2A>G             | IVS3-2 A>G               | NM_001037.4                | T, C    |
| B0076 | <i>SCN2A</i>   | Het | c.5645G>A              | p.Arg1882Gln             | NM_021007.2                | T, C, P |
| B0017 | <i>SCN2A</i>   | Het | c.3947C>T              | p.Ala1316Val             | NM_021007.2                | T       |
| B0220 | <i>SCN2A</i>   | Het | c.1301C>A              | p.Ala434Asp              | NM_021007.2                | T       |
| B0008 | <i>SCN2A</i>   | Het | c.2809C>T              | p.Arg937Cys              | NM_021007.2                | T, C    |
| B0345 | <i>SCN2A</i>   | Het | c.643G>C               | p.Ala215Pro              | NM_021007.2                | T       |
| B0620 | <i>SCN2A</i>   | Het | c.4418T>C              | p.Ile1473Thr             | NM_021007.2                | T       |
| B0526 | <i>SCN2A</i>   | Het | c.3149A>G              | p.Asp1050Gly             | NM_021007.2                | NR      |
| B0127 | <i>SCN8A</i>   | Het | c.1228G>C              | p.Val410Leu              | NM_014191.3                | NR      |
| B0168 | <i>SCN8A</i>   | Het | c.5614C>T              | p.Arg1872Trp             | NM_014191.3                | U       |
| B0317 | <i>SCN8A</i>   | Het | c.2525T>A              | p.Val842Glu              | NM_014191.3                | T       |
| B0452 | <i>SCN8A</i>   | Het | c.4873G>T              | p.Gly1625Trp             | NM_014191.3                | T, C, P |
| B0034 | <i>SEPSECS</i> | Hom | c.176C>T               | p.Ala59Val               | NM_016955.3                | P       |
| B0386 | <i>SHANK3</i>  | Het | c.3997dupG             | p.Val1333Glyfs*28        | NM_033517.1                | C       |
| B0101 | <i>SLC12A5</i> | Hom | c.983A>G               | p.Asn328Ser              | NM_020708.4                | T, C    |
| B0212 | <i>SLC2A1</i>  | Hom | c.79G>A                | p.Gly27Ser               | NM_006516.2                | T, C    |
| B0585 | <i>SLC2A1</i>  | Het | c.493G>A               | p.Val165Ile              | NM_006516.2                | T, C    |
| B0048 | <i>SPTAN1</i>  | Het | c.6922C>T              | p.Arg2308Cys             | NM_001130438.2             | NR      |
| B0092 | <i>STXBP1</i>  | Het | c.703C>T               | p.Arg235X                | NM_003165.3                | NR      |
| B0125 | <i>STXBP1</i>  | Het | c.430-1G>T             | IVS6-1G>T                | NM_003165.2                | C       |
| B0518 | <i>STXBP1</i>  | Het | c.1708A>G              | p.Thr570Ala              | NM_003165.3                | U       |
| B0702 | <i>STXBP1</i>  | Het | c.525delG              | p.Ile176Serfs*8          | NM_003165.3                | C       |
| B0448 | <i>SYNGAP1</i> | Het | c.915_933del19         | p.Val306Serfs*35         | NM_006772.2                | NR      |
| B0503 | <i>TBL1XR1</i> | Het | c.1108G>A              | p.Asp370Asn              | NM_024665.4                | NR      |
| B0039 | <i>TPP1</i>    | CH  | c.1093T>C<br>c.1600C>T | p.Cys365Arg<br>p.Gln534* | NM_000391.3<br>NM_000391.3 | T, C, P |
| B0484 | <i>TRIM8</i>   | Het | c.1380T>G              | p.Tyr460*                | NM_030912.2                | C       |
| B0078 | <i>TSC2</i>    | Het | c.2410T>C              | p.Cys804Arg              | NM_000548.3                | U       |

|       |               |      |                    |                                                                                    |             |      |
|-------|---------------|------|--------------------|------------------------------------------------------------------------------------|-------------|------|
| B0251 | <i>TSC2</i>   | Het  | c.4747G>A          | p.Glu1583Lys                                                                       | NM_000548.3 | C    |
| B0556 | <i>TSC2</i>   | Het  | c.3693_3696delGTCT | p.Ser1232Thrfs*92                                                                  | NM_000548.3 | T, C |
| B0615 | <i>TSC2</i>   | Het  | c.2714G>A          | p.Arg905Gln                                                                        | NM_000548.3 | T, C |
| B0557 | <i>TUBB2A</i> | Het  | c.743C>T           | p.Ala248Val                                                                        | NM_001069.2 | C    |
| B0610 | <i>UBE3A</i>  | N/A  | N/A                | 15q11.2-q13.3<br>amplification including<br><i>UBE3A</i> on maternal<br>chromosome | NM_130839.1 | NR   |
| B0024 | <i>UPF3B</i>  | Hemi | c.159delGGinsTAC   | p.Val54Thrfs*2                                                                     | NM_080632.2 | NR   |
| B0142 | <i>WDR45</i>  | Het  | c.700C>T           | p.3052delThr                                                                       | NM_007075   | P    |
| B0404 | <i>WDR45</i>  | Hemi | c.752_754delCCT    | p.Ser251del                                                                        | NM_007075.3 | T, P |
| B0536 | <i>WDR73</i>  | Hom  | c.750_751delTT     | p.Cys251Serfs*3                                                                    | NM_032856.3 | C    |
| B0100 | <i>ZEB2</i>   | Het  | c.289delT          | p.Trp97GlyfsX11                                                                    | NM_014795.3 | C    |
| B0108 | <i>ZEB2</i>   | Het  | c.904C>T           | p.Arg302*                                                                          | NM_014795.3 | C    |

\*T = treatment, C = care coordination, P = prognosis, D = correction of diagnosis, U = unknown, NR = None recorded

Abbreviations: CH = compound heterozygous, D = change in diagnosis, Hemi = hemizygous, Het = heterozygous, Hom = homozygous, N/A = not applicable

**Table S4.** Detailed information on medical impact of genetic diagnosis for 152 individuals.

| Study ID | Affected gene(s) | Zygosity | Medical management impact category* | Additional details on medical impact by category                                                                                                                                                                                                                                                                                                                                                                           |
|----------|------------------|----------|-------------------------------------|----------------------------------------------------------------------------------------------------------------------------------------------------------------------------------------------------------------------------------------------------------------------------------------------------------------------------------------------------------------------------------------------------------------------------|
| B0459    | <i>ACTB</i>      | Het      | C                                   | Recommended echocardiogram and referred to cardiology                                                                                                                                                                                                                                                                                                                                                                      |
| B0411    | <i>AGO1</i>      | Het      | NR                                  |                                                                                                                                                                                                                                                                                                                                                                                                                            |
| B0249    | <i>ALG11</i>     | Hom      | C                                   | Monitoring for medical issues associated with congenital disorders of glycosylation                                                                                                                                                                                                                                                                                                                                        |
| B0257    | <i>ALG11</i>     | Hom      | C                                   | Monitoring for medical issues associated with congenital disorders of glycosylation                                                                                                                                                                                                                                                                                                                                        |
| B0500    | <i>AP4S1</i>     | Hom      | C                                   | Recommended multidisciplinary care by ophthalmology, nutrition, orthopedics, and neurology                                                                                                                                                                                                                                                                                                                                 |
| B0213    | <i>ARHGEF9</i>   | Het      | NR                                  |                                                                                                                                                                                                                                                                                                                                                                                                                            |
| B0091    | <i>ARX</i>       | Hemi     | NR                                  |                                                                                                                                                                                                                                                                                                                                                                                                                            |
| B0533    | <i>ARX</i>       | Hemi     | NR                                  |                                                                                                                                                                                                                                                                                                                                                                                                                            |
| B0252    | <i>ATPIA3</i>    | Het      | T                                   | Affected ASM management and movement disorder treatment – clobazam considered given dual improvement in seizures and movement disorders                                                                                                                                                                                                                                                                                    |
| B0205    | <i>ATP6V1A</i>   | Het      | C                                   | Recommended ophthalmology evaluation due to oculomotor apraxia and counseled on issues associated with amelogenesis imperfecta                                                                                                                                                                                                                                                                                             |
| B0241    | <i>BRAT1</i>     | CH       | C, P                                | C: Counseled on risk of respiratory complications and refractory epilepsy<br>P: Counseled on early lethality associated with compound heterozygous variants, individual was deceased at age 2 years                                                                                                                                                                                                                        |
| B0506    | <i>CACNA1A</i>   | Het      | D                                   | Mitochondrial disease was suspected, diagnosis changed after genetic testing                                                                                                                                                                                                                                                                                                                                               |
| B0275    | <i>CACNA1E</i>   | Het      | NR                                  | Individual was deceased prior to genetic diagnosis                                                                                                                                                                                                                                                                                                                                                                         |
| C0003    | <i>CDKL5</i>     | Het      | T, C, P                             | T: Affected approach to ASM management, with a period off of medication due to highly refractory nature of disorder and serious side effects. Discussed ganaxolone trial.<br>C: Followed in disease-specific multidisciplinary CDD clinic, followed in orthopedics due to scoliosis and neuro-ophthalmology due to CVI, recommended EKG<br>P: Discussed phenotype and poor prognosis of CDD, including risk of early death |
| C0005    | <i>CDKL5</i>     | Het      | C, P                                | C: Followed in disease-specific multidisciplinary CDD clinic, referred to behavioral neurology, neuro-ophthalmology, and sleep clinic<br>P: Discussed phenotype and poor prognosis of CDD, including risk of early death                                                                                                                                                                                                   |
| C0017    | <i>CDKL5</i>     | Hemi     | T, C, P                             | T: Discussed clinical trial options with family<br>C: Followed in disease-specific multidisciplinary CDD clinic, referred to orthopedics and neuro-ophthalmology, recommended yearly EKG<br>P: Discussed phenotype and poor prognosis of CDD, including risk of early death                                                                                                                                                |
| C0023    | <i>CDKL5</i>     | Het      | T, C, P                             | T: Discussed clinical trial options with family<br>C: Followed in disease-specific multidisciplinary CDD clinic, referral to orthopedics and sleep clinic, also followed in neuro-ophthalmology and behavioral neurology                                                                                                                                                                                                   |

|       |                |     |         |                                                                                                                                                                                                                                                                                                        |
|-------|----------------|-----|---------|--------------------------------------------------------------------------------------------------------------------------------------------------------------------------------------------------------------------------------------------------------------------------------------------------------|
|       |                |     |         | P: Discussed phenotype and prognosis of CDD, including risk of early death                                                                                                                                                                                                                             |
| C0033 | <i>CDKL5</i>   | Het | T, C, P | T: Affected ASM management - prescribed cannabidiol (Epidiolex)<br>C: Followed in disease-specific multidisciplinary CDD clinic, referral to neuro-ophthalmology and augmentative communication program, recommended EKG<br>P: Discussed phenotype and prognosis of CDD, including risk of early death |
| C0047 | <i>CDKL5</i>   | Het | T, C, P | T: Affected ASM management – prescribed cannabidiol (Epidiolex), clinical trial options discussed with family<br>C: Followed in disease-specific multidisciplinary CDD clinic, recommended yearly EKG<br>P: Discussed phenotype and prognosis of CDD, including risk of early death                    |
| B0341 | <i>CHAT</i>    | CH  | C, P    | C: Management related to congenital myasthenic syndrome (e.g. recommended respiratory evaluation). Epilepsy was secondary to hypoxic-ischemic events due to apneas.<br>P: Counseled on prognosis                                                                                                       |
| B0053 | <i>CHD2</i>    | Het | NR      |                                                                                                                                                                                                                                                                                                        |
| B0131 | <i>CHD2</i>    | Het | NR      |                                                                                                                                                                                                                                                                                                        |
| B0457 | <i>CHD2</i>    | Het | NR      |                                                                                                                                                                                                                                                                                                        |
| B0614 | <i>CHD2</i>    | Het | C       | Monitored for autism and counseled regarding potential developmental issues                                                                                                                                                                                                                            |
| B0631 | <i>CHD2</i>    | Het | C       | C: Counseled on range of outcomes including developmental disorders                                                                                                                                                                                                                                    |
| B0279 | <i>CHRNA7</i>  | Het | NR      |                                                                                                                                                                                                                                                                                                        |
| B0420 | <i>CNTNAP2</i> | CH  | C       | C: Monitored for autism spectrum disorder and developmental regression                                                                                                                                                                                                                                 |
| B0295 | <i>COL4A1</i>  | Het | C       | C: Screening for renal tubulopathy, referral to cardiology and ophthalmology                                                                                                                                                                                                                           |
| B0659 | <i>DLL1</i>    | Het | NR      |                                                                                                                                                                                                                                                                                                        |
| B0102 | <i>DYNC1H1</i> | Het | C       | Discussed referral for neuromuscular evaluation                                                                                                                                                                                                                                                        |
| B0499 | <i>DYNC1H1</i> | Het | C       | Referred to neuromuscular clinic due to risk of neuromuscular abnormalities                                                                                                                                                                                                                            |
| B0686 | <i>DYNC1H1</i> | Het | C       | Referred to neuromuscular clinic                                                                                                                                                                                                                                                                       |
| B0639 | <i>EEF1A2</i>  | Het | NR      |                                                                                                                                                                                                                                                                                                        |
| B0049 | <i>ERCC5</i>   | Hom | NR      |                                                                                                                                                                                                                                                                                                        |
| B0310 | <i>FOXG1</i>   | Het | U       | Individual was not followed after genetic results                                                                                                                                                                                                                                                      |
| B0200 | <i>FRRS1L</i>  | Hom | T       | Potential impact on ASM choice – clobazam is potentially helpful, perampanel should be avoided                                                                                                                                                                                                         |
| B0437 | <i>FRRS1L</i>  | Hom | NR      |                                                                                                                                                                                                                                                                                                        |
| B0111 | <i>GABRB2</i>  | Het | NR      | Individual was deceased prior to genetic results                                                                                                                                                                                                                                                       |
| B0272 | <i>GABRG2</i>  | Het | NR      |                                                                                                                                                                                                                                                                                                        |
| B0294 | <i>GNAO1</i>   | Het | C, D    | C: Monitoring for movement disorder<br>D: Primary mitochondrial disease was the presumptive diagnosis for many years, diagnosis changed after genetic testing                                                                                                                                          |
| B0044 | <i>GRIN2A</i>  | Het | T       | Treated with dextromethorphan and memantine, memantine having meaningful benefit                                                                                                                                                                                                                       |
| B0426 | <i>GRIN2A</i>  | Het | T       | Affected ASM management – avoided felbamate and perampanel                                                                                                                                                                                                                                             |
| B0460 | <i>GRIN2A</i>  | Het | NR      |                                                                                                                                                                                                                                                                                                        |
| B0206 | <i>HNRNPU</i>  | Het | NR      |                                                                                                                                                                                                                                                                                                        |
| B0464 | <i>HNRNPU</i>  | Het | NR      |                                                                                                                                                                                                                                                                                                        |

|       |               |     |         |                                                                                                                                                                                                           |
|-------|---------------|-----|---------|-----------------------------------------------------------------------------------------------------------------------------------------------------------------------------------------------------------|
| B0169 | <i>IFIH1</i>  | Het | C       | Referral to neuroimmunology and rheumatology                                                                                                                                                              |
| B0178 | <i>IQSEC2</i> | Het | NR      |                                                                                                                                                                                                           |
| B0126 | <i>ITPA</i>   | Hom | NR      | Individual was deceased prior to genetic results                                                                                                                                                          |
| B0419 | <i>KANSL1</i> | Het | C       | C: Recommended renal ultrasound and orthopedics evaluation                                                                                                                                                |
| B0463 | <i>KANSL1</i> | Het | C       | Recommended renal ultrasound, ophthalmology evaluation and cardiology evaluation                                                                                                                          |
| B0030 | <i>KCNH1</i>  | Het | C       | Requested EKG due to potential for cardiac complications                                                                                                                                                  |
| B0482 | <i>KCNMA1</i> | Het | C       | Genetic diagnosis contributed to surgical decision-making, leading to corpus callosotomy                                                                                                                  |
| B0038 | <i>KCNQ2</i>  | Het | T       | Discussed that individuals are often responsive to phenobarbital                                                                                                                                          |
| B0041 | <i>KCNQ2</i>  | Het | T, P    | T: Added oxcarbazepine with good seizure control, eventually individual was seizure free and weaned off medications<br>P: Discussed that diagnosis and clinical course is associated with good prognosis  |
| B0085 | <i>KCNQ2</i>  | Het | P       | Discussed optimistic prognosis                                                                                                                                                                            |
| B0128 | <i>KCNQ2</i>  | Het | T, C    | T: Treated with ezogabine<br>C: Referral to neuromuscular program and neuropsychology                                                                                                                     |
| B0150 | <i>KCNQ2</i>  | Het | T       | Treated with ezogabine                                                                                                                                                                                    |
| B0180 | <i>KCNQ2</i>  | Het | T, P    | T: Considered treatment with ezogabine<br>P: Counseled on prognosis                                                                                                                                       |
| B0350 | <i>KCNQ2</i>  | Het | P       | P: Counseled on benign prognosis                                                                                                                                                                          |
| B0352 | <i>KCNQ2</i>  | Het | T       | Affected ASM management – considered treatment with sodium channel blockers, as well as vigabatrin, clobazam, lamotrigine and phenytoin                                                                   |
| B0444 | <i>KCNQ2</i>  | Het | T       | Affected ASM management, with use of sodium channel blockers and consideration of ezogabine                                                                                                               |
| B0564 | <i>KCNQ2</i>  | Het | U       | Individual was not followed after genetic results                                                                                                                                                         |
| B0634 | <i>KCNQ2</i>  | Het | T, C, P | T: Carbamazepine considered as potential ASM choice<br>C: Monitored development and seizures<br>P: Counseled on range of outcomes including persistent seizures and developmental learning problems       |
| B0651 | <i>KCNQ2</i>  | Het | T, C, P | T: Affected ASM management – phenytoin and carbamazepine are particularly beneficial, individual was later treated with ezogabine<br>C: Annual EKG recommended<br>P: Counseled on elevated risk for SUDEP |
| B0145 | <i>KCNT1</i>  | Het | T, C    | T: Considered treatment with quinidine, off-label use based on pathway<br>C: Referral to cardiology due to risk of cardiac arrhythmias                                                                    |
| B0701 | <i>KCNT1</i>  | Het | T       | Off-label treatment with quinidine, potentially useful due to inhibition of sodium-activated potassium channels                                                                                           |
| B0031 | <i>MECP2</i>  | Het | C, P    | C: Referred to other specialists for management of Rett syndrome<br>P: Discussed the phenotype and prognosis of Rett syndrome                                                                             |
| B0243 | <i>MECP2</i>  | Het | C       | Referred to disease-specific multidisciplinary clinic for Rett syndrome                                                                                                                                   |
| B0697 | <i>MEF2C</i>  | Het | T       | T: Affected ASM management – treated with valproic acid                                                                                                                                                   |
| B0159 | <i>NBEA</i>   | Het | NR      |                                                                                                                                                                                                           |
| B0487 | <i>NEXMIF</i> | Het | NR      |                                                                                                                                                                                                           |
| B0537 | <i>NEXMIF</i> | Het | U       | Individual was not followed after genetic results                                                                                                                                                         |
| B0542 | <i>NHLRC1</i> | CH  | T, C, P | T: Treated with perampanel for seizures based on case reports of Lafora disease, discussed upcoming clinical trials with family<br>C: Coordinated care across multiple specialties                        |

|       |                              |     |         |                                                                                                                                                                                                                                                                            |
|-------|------------------------------|-----|---------|----------------------------------------------------------------------------------------------------------------------------------------------------------------------------------------------------------------------------------------------------------------------------|
|       |                              |     |         | P: Counseled on poor prognosis in this progressive neurodegenerative disorder                                                                                                                                                                                              |
| B0055 | <i>NPRL2</i>                 | Het | NR      |                                                                                                                                                                                                                                                                            |
| B0046 | <i>NRXN1</i><br><i>NRXN2</i> | CH  | NR      | Individual was deceased prior to genetic results                                                                                                                                                                                                                           |
| B0443 | <i>NRXN1</i>                 | Het | NR      |                                                                                                                                                                                                                                                                            |
| B0333 | <i>PACS2</i>                 | Het | U       | Individual was not followed after genetic results                                                                                                                                                                                                                          |
| B0694 | <i>PACS2</i>                 | Het | P       | Counseled on optimistic prognosis                                                                                                                                                                                                                                          |
| B0261 | <i>PCDH19</i>                | Het | C, P    | C: Monitoring for cognitive and behavioral concerns<br>P: Discussed phenotype and prognosis of individuals with <i>PCDH19</i> variants                                                                                                                                     |
| B0307 | <i>PCDH19</i>                | Het | T, C    | T: Affected ASM management – treated with lamotrigine, considered valproic acid, considered clinical trial options (ganaxolone)<br>C: Monitored for behavioral or learning difficulties                                                                                    |
| B0217 | <i>PLPBP</i>                 | Hom | T       | Supplementation with pyridoxine                                                                                                                                                                                                                                            |
| B0029 | <i>PNPO</i>                  | Hom | T       | Treated with pyridoxal-5'-phosphate (P5P)                                                                                                                                                                                                                                  |
| B0095 | <i>PNPO</i>                  | Hom | T       | Supplementation with pyridoxal-5'-phosphate                                                                                                                                                                                                                                |
| B0271 | <i>PNPO</i>                  | Hom | T       | Treatment with pyridoxal-5'-phosphate is specific to diagnosis                                                                                                                                                                                                             |
| B0028 | <i>POLG</i>                  | CH  | T, C, P | T: Started on mitochondrial cocktail<br>C: Monitored for progressive liver failure<br>P: Counseled on prognosis, characterized by progressive neurological symptoms and liver failure. Individual was later deceased.                                                      |
| B0625 | <i>POLG</i>                  | CH  | T, C, P | T: Affected ASM management – avoided treatment with valproic acid<br>C: Monitored for hepatic complications and developmental regression, referred to ophthalmology and neuro-metabolism<br>P: Discussed phenotype and prognosis for individuals with <i>POLG</i> variants |
| B0051 | <i>PRRT2</i>                 | Het | C, P    | C: Monitored for movement disorders such as PKD<br>P: Discussed optimistic prognosis (benign familial infantile seizures)                                                                                                                                                  |
| B0065 | <i>PRRT2</i>                 | Het | T, C, P | T: Discussed that in case of PKD, response to carbamazepine or oxcarbazepine is favorable<br>C: Recommended neuropsychological evaluation<br>P: Discussed optimistic prognosis                                                                                             |
| B0067 | <i>PRRT2</i>                 | Het | T, C, P | T: Discussed treatment with oxcarbazepine or carbamazepine in case of PKD<br>C: Recommended spine films due to the risk of vertebral defects and echocardiogram due to risk of congenital heart disease<br>P: Discussed optimistic prognosis                               |
| B0328 | <i>PRRT2</i>                 | Het | C, P    | C: Counseled/monitored for choreoathetosis<br>P: Counseled on positive prognosis                                                                                                                                                                                           |
| B0434 | <i>PRRT2</i>                 | Het | T, C, P | T: Discussed potential effect on ASM management – oxcarbazepine and carbamazepine have been shown to improve seizures<br>C: Monitored for movement disorders and migraine<br>P: Counseled on overall favorable prognosis                                                   |
| B0441 | <i>PRRT2</i>                 | Het | C, P    | C: Referred to movement disorder specialist<br>P: Counseled on overall favorable prognosis                                                                                                                                                                                 |
| B0558 | <i>PRRT2</i>                 | Het | T, C, P | T: Affected ASM management, treated with oxcarbazepine with excellent response                                                                                                                                                                                             |

|       |                |     |         |                                                                                                                                                                                                                                                                                                  |
|-------|----------------|-----|---------|--------------------------------------------------------------------------------------------------------------------------------------------------------------------------------------------------------------------------------------------------------------------------------------------------|
|       |                |     |         | C: Referred to early intervention and monitored for movement disorder<br>P: Counseled on optimistic prognosis                                                                                                                                                                                    |
| B0658 | <i>PRRT2</i>   | Het | T, C    | T: Affected ASM management – treated with oxcarbazepine<br>C: Monitored for movement disorder                                                                                                                                                                                                    |
| B0278 | <i>RHOBTB2</i> | Het | NR      |                                                                                                                                                                                                                                                                                                  |
| B0068 | <i>SCN1A</i>   | Het | T, P    | T: Discussed treatment with fenfluramine when in trial stage and initiated treatment once medication was approved for Dravet syndrome<br>P: Discussed higher risk of SUDEP                                                                                                                       |
| B0069 | <i>SCN1A</i>   | Het | T, C, P | T: Affected ASM management, counseled against using lamotrigine and other sodium channel medications, suggested valproic acid, clobazam and levetiracetam as possible treatment options<br>C: Suggested EKG and neuropsychological testing<br>P: Discussed risk of cardiac arrhythmias and SUDEP |
| B0072 | <i>SCN1A</i>   | Het | T, C, P | T: Recommended use of seizure medications effective for Dravet syndrome<br>C: Diagnosis influenced coordination of care with epilepsy surgical team<br>P: Discussed increased risk of SUDEP                                                                                                      |
| B0079 | <i>SCN1A</i>   | Het | T       | Participated in fenfluramine open-label trial                                                                                                                                                                                                                                                    |
| B0086 | <i>SCN1A</i>   | Het | T       | Considered treatment with cannabidiol (Epidiolex), fenfluramine and ASO trial                                                                                                                                                                                                                    |
| B0175 | <i>SCN1A</i>   | Het | U       | Followed at another site                                                                                                                                                                                                                                                                         |
| B0225 | <i>SCN1A</i>   | Het | T       | Affected ASM management - weaned lamotrigine given individual's genetic variant                                                                                                                                                                                                                  |
| B0226 | <i>SCN1A</i>   | Het | T       | Treated with ASMs known to be helpful in Dravet syndrome, discussed clinical trial with Ataluren                                                                                                                                                                                                 |
| B0304 | <i>SCN1A</i>   | Het | T, P    | T: Affected ASM management – treated with levetiracetam, considered clobazam and valproic acid, counseled on avoidance of sodium channel blockers<br>P: Counseled on increased risk of SUDEP                                                                                                     |
| B0306 | <i>SCN1A</i>   | Het | T, C, P | T: Affected ASM management – avoided sodium channel blockers, considered clobazam<br>C: Monitored for possible arrhythmias<br>P: Counseled on increased risk of SUDEP                                                                                                                            |
| B0312 | <i>SCN1A</i>   | Het | T, C, P | T: Affected ASM management, considered treatment with clobazam and topiramate<br>C: Referred to cardiology<br>P: Counseled on increased risk of SUDEP                                                                                                                                            |
| B0405 | <i>SCN1A</i>   | Het | T       | Affected ASM management – treated with valproic acid and topiramate                                                                                                                                                                                                                              |
| B0408 | <i>SCN1A</i>   | Het | T       | Affected ASM management – treated with valproic acid                                                                                                                                                                                                                                             |
| B0525 | <i>SCN1A</i>   | Het | T       | Affected ASM management with avoidance of sodium channel medications                                                                                                                                                                                                                             |
| B0552 | <i>SCN1A</i>   | Het | T, C    | T: Affected ASM management with avoidance of sodium channel blockers; considered fenfluramine trial<br>C: Impact on surgical decision-making for epilepsy as the family was considering corpus callosotomy                                                                                       |
| B0584 | <i>SCN1A</i>   | Het | T, C, P | T: Affected ASM management - avoidance of sodium channel medications<br>C: Monitoring for developmental delay<br>P: Counseled on risk of SUDEP and likelihood of continued seizures                                                                                                              |

|       |                |     |         |                                                                                                                                                                                                                                                                                           |
|-------|----------------|-----|---------|-------------------------------------------------------------------------------------------------------------------------------------------------------------------------------------------------------------------------------------------------------------------------------------------|
| B0644 | <i>SCN1A</i>   | Het | T, C    | T: Affected ASM management – removed oxcarbazepine, treated with levetiracetam, considered clobazam and valproic acid, counseled against the use of phenytoin and carbamazepine<br>C: Monitored for developmental issues and regression                                                   |
| B0688 | <i>SCN1A</i>   | Het | T, C, P | T: Affected ASM management with initiation of clobazam, discussed fenfluramine trial<br>C: Referred to cardiology<br>P: Counseled on increased risk of SUDEP                                                                                                                              |
| B0698 | <i>SCN1A</i>   | Het | T, C, P | T: Affected ASM management - prescribed cannabidiol (Epidiolex) and considered fenfluramine, also treated with ketogenic diet<br>C: Recommended cardiology evaluation<br>P: Counseled on increased risk of SUDEP                                                                          |
| B0451 | <i>SCN1B</i>   | Hom | T, C    | T: Affected ASM management, with avoidance of sodium channel blockers and consideration of ketogenic diet<br>C: Recommended EKG and cardiology evaluation due to association with Brugada syndrome, prolonged QT syndrome and other arrhythmias                                           |
| B0008 | <i>SCN2A</i>   | Het | T, C    | T: Avoided treatment with sodium channel blockers<br>C: Suggested EKG to detect possible rhythm abnormalities                                                                                                                                                                             |
| B0017 | <i>SCN2A</i>   | Het | T       | Considered medications with evidence of effectiveness such as phenytoin, phenobarbital, lamotrigine and topiramate                                                                                                                                                                        |
| B0076 | <i>SCN2A</i>   | Het | T, C, P | T: Treated with phenytoin, triheptanoin as part of small trial, and riluzole off-label<br>C: Monitoring for movement disorder<br>P: Counseled on the phenotype associated with <i>SCN2A</i> variant and prognosis over time                                                               |
| B0220 | <i>SCN2A</i>   | Het | T       | Affected ASM management - sodium channel blockers known to be helpful                                                                                                                                                                                                                     |
| B0345 | <i>SCN2A</i>   | Het | T       | Affected ASM management – treated with oxcarbazepine                                                                                                                                                                                                                                      |
| B0526 | <i>SCN2A</i>   | Het | NR      |                                                                                                                                                                                                                                                                                           |
| B0620 | <i>SCN2A</i>   | Het | T       | Affected ASM management – used sodium channel blockers                                                                                                                                                                                                                                    |
| B0127 | <i>SCN8A</i>   | Het | NR      |                                                                                                                                                                                                                                                                                           |
| B0168 | <i>SCN8A</i>   | Het | U       | Individual was not followed after genetic results                                                                                                                                                                                                                                         |
| B0317 | <i>SCN8A</i>   | Het | T       | Affected ASM management - treated with lacosamide with excellent response                                                                                                                                                                                                                 |
| B0452 | <i>SCN8A</i>   | Het | T, C, P | T: Affected ASM management – treated with sodium channel blockers<br>C: Referred to ophthalmology, counseled on movement disorder, monitored for other complications (gastrointestinal issues, autonomic dysfunction, hearing loss, scoliosis)<br>P: Counseled on increased risk of SUDEP |
| B0034 | <i>SEPSECS</i> | Hom | P       | Counseled on prognosis in this progressive disorder                                                                                                                                                                                                                                       |
| B0386 | <i>SHANK3</i>  | Het | C       | C: Recommended cardiac screening, renal ultrasound, ophthalmological exams and dental exams                                                                                                                                                                                               |
| B0101 | <i>SLC12A5</i> | Hom | T, C    | T: Discussed ASMs with better evidence for seizure control, including potassium bromide, levetiracetam, rufinamide, stiripentol, clonazepam, and cannabinoids.<br>C: Recommended screening for scoliosis and feeding/speech therapy                                                       |
| B0212 | <i>SLC2A1</i>  | Hom | T, C    | T: Treated with ketogenic diet, a specific treatment for this disorder                                                                                                                                                                                                                    |



|       |                |      |         |                                                                                                                                                                                                                                                    |
|-------|----------------|------|---------|----------------------------------------------------------------------------------------------------------------------------------------------------------------------------------------------------------------------------------------------------|
|       |                |      |         | C: Management of hemiplegic migraine associated with this disorder, including imaging recommendations. Monitoring for movement disorders.                                                                                                          |
| B0585 | <i>SLC2A1</i>  | Het  | T, C    | T: Treated with ketogenic diet<br>C: Monitored for movement disorder                                                                                                                                                                               |
| B0048 | <i>SPTAN1</i>  | Het  | NR      |                                                                                                                                                                                                                                                    |
| B0092 | <i>STXBP1</i>  | Het  | NR      |                                                                                                                                                                                                                                                    |
| B0125 | <i>STXBP1</i>  | Het  | C       | Monitoring for movement disorder                                                                                                                                                                                                                   |
| B0518 | <i>STXBP1</i>  | Het  | U       |                                                                                                                                                                                                                                                    |
| B0702 | <i>STXBP1</i>  | Het  | C       | Monitored for developmental delay and ASD                                                                                                                                                                                                          |
| B0448 | <i>SYNGAP1</i> | Het  | NR      |                                                                                                                                                                                                                                                    |
| B0503 | <i>TBL1XR1</i> | Het  | NR      |                                                                                                                                                                                                                                                    |
| B0039 | <i>TPP1</i>    | CH   | T, C, P | T: Discussed that carbamazepine, phenytoin and lamotrigine may exacerbate seizures and myoclonus<br>C: Recommended ophthalmologic evaluation and tissue biopsy<br>P: Counseled on the possibility of presenting a neurodegenerative disorder (NCL) |
| B0484 | <i>TRIM8</i>   | Het  | C       | Monitored for renal disease                                                                                                                                                                                                                        |
| B0078 | <i>TSC2</i>    | Het  | U       | Individual was not followed after genetic results                                                                                                                                                                                                  |
| B0251 | <i>TSC2</i>    | Het  | C       | Referred to disease-specific multidisciplinary clinic for TSC, received related medical monitoring and diagnostic studies                                                                                                                          |
| B0556 | <i>TSC2</i>    | Het  | T, C    | T: Treated with vigabatrin for infantile spasms, with resolution<br>C: Followed in disease-specific multidisciplinary TSC clinic, recommended cardiology and ophthalmology evaluations as well as periodic abdominal and brain MRIs                |
| B0615 | <i>TSC2</i>    | Het  | T, C    | T: Considered vigabatrin for seizure treatment<br>C: Referred to disease-specific multidisciplinary TSC clinic                                                                                                                                     |
| B0557 | <i>TUBB2A</i>  | Het  | C       | Recommended ophthalmologic evaluation due to possible risk of congenital fibrosis of extraocular muscles                                                                                                                                           |
| B0610 | <i>UBE3A</i>   | n/a  | NR      |                                                                                                                                                                                                                                                    |
| B0024 | <i>UPF3B</i>   | Hemi | NR      |                                                                                                                                                                                                                                                    |
| B0142 | <i>WDR45</i>   | Het  | P       | Neurodegenerative disorder with reduced life expectancy                                                                                                                                                                                            |
| B0404 | <i>WDR45</i>   | Hemi | T, P    | T: Considered treatment with iron chelator deferiprone<br>P: Counseled regarding prognosis                                                                                                                                                         |
| B0536 | <i>WDR73</i>   | Hom  | C       | Referred to nephrology                                                                                                                                                                                                                             |
| B0100 | <i>ZEB2</i>    | Het  | C       | Various specialist referrals to follow features associated with Mowat-Wilson syndrome                                                                                                                                                              |
| B0108 | <i>ZEB2</i>    | Het  | C       | Various specialist referrals to follow features associated with Mowat-Wilson syndrome                                                                                                                                                              |

\*T = Treatment, C = Care coordination, P = Prognosis, D = Change in diagnosis, U = Unknown, NR = None recorded

Note: Rows highlighted in gray indicate individuals with neurotypical development and diagnostic results.  
Abbreviations: ASD = Autism Spectrum Disorder, ASM = Anti-seizure medication, CDD = CDKL5 Deficiency Disorder, CVI = Cortical visual impairment, EKG = Electrocardiogram, NCL = Neuronal ceroid lipofuscinosis, PKD = Paroxysmal kinesigenic dyskinesia, SUDEP = Sudden Unexpected Death in Epilepsy, TSC = Tuberous Sclerosis Complex
